# Supplementary material for: Feasibility and Safety of Seated Virtual Reality Rehabilitation for Chemotherapy-Induced Peripheral Neuropathy
Source: Research Square preprint supplement (doi:10.21203/rs.3.rs-7031674/v1), 2025-08-13
Supplement: Supplementary file 1 [file d7ab71451b8bb44a4664a32f.pdf]

Supplementary Information for:

**Feasibility and Safety of Seated Virtual Reality Rehabilitation for Chemotherapy-Induced Peripheral Neuropathy**

Chieko Miyata<sup>1,\*</sup>, Hirokazu Furuta<sup>2</sup>, Kohei Mizuno<sup>2</sup>, Yosuke Hosaka<sup>1</sup>

<sup>1</sup>Clinical Research Center, NHO Tokyo medical center, 2-5-1, Higashigaoka, Meguro-ku, Tokyo, 152-8902, Japan

<sup>2</sup>Department of Rehabilitation medicine, NHO Tokyo medical center, 2-5-1, Higashigaoka, Meguro-ku, Tokyo, 152-8902, Japan

\* E-mail: kumalmie2chibi3@yahoo.co.jp, Phone: +81-3-3411-0111, Fax: +81-3-3412-9811

This supplementary information document includes:

Figure S1: Image during virtual reality-guided rehabilitation session.

Figure S2 (a): The patient's view of the virtual reality space during task execution.

Figure S2 (b): The patient's view of the virtual reality space upon task success.

**Figure S1. Image during virtual reality-guided rehabilitation session.**

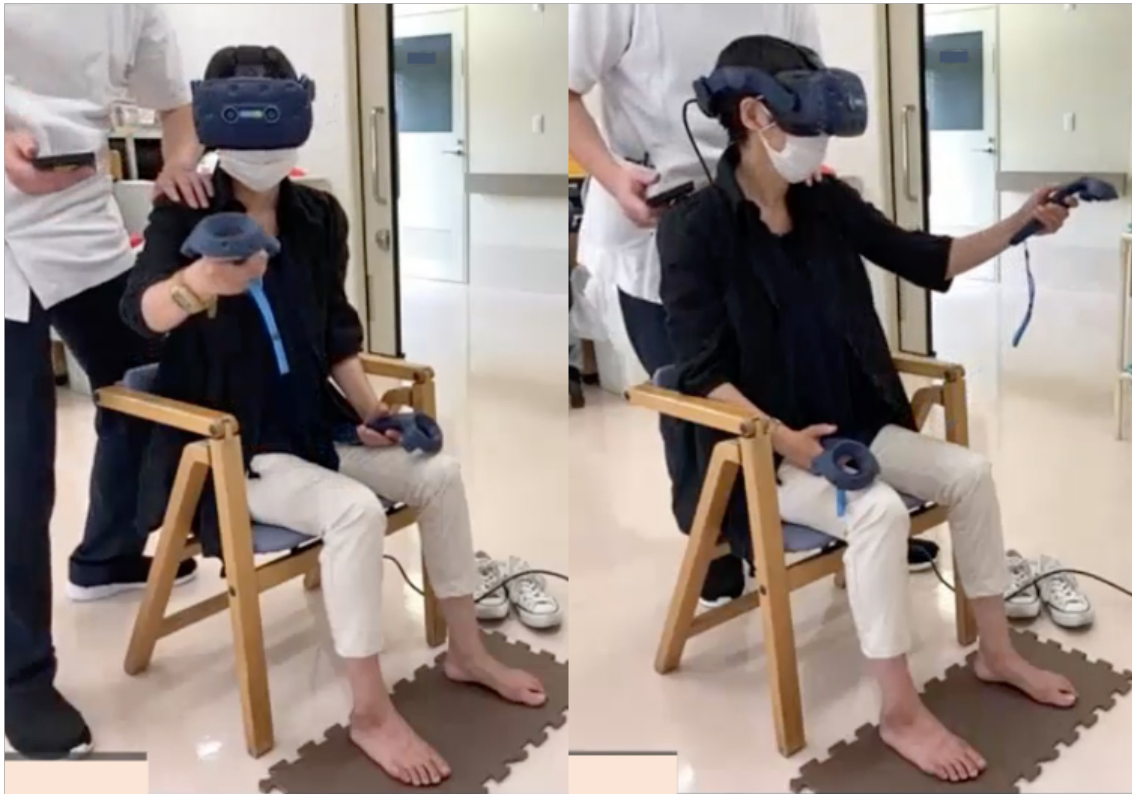

The participant is seated barefoot in a chair with a backrest and armrests, wearing a head-mounted display and holding controllers in both hands. A rehabilitation professional is adjusting the initial settings of the reach range based on the participant's condition.

**Figure S2.**

**(a) The patient's view of the virtual reality space during task execution.**

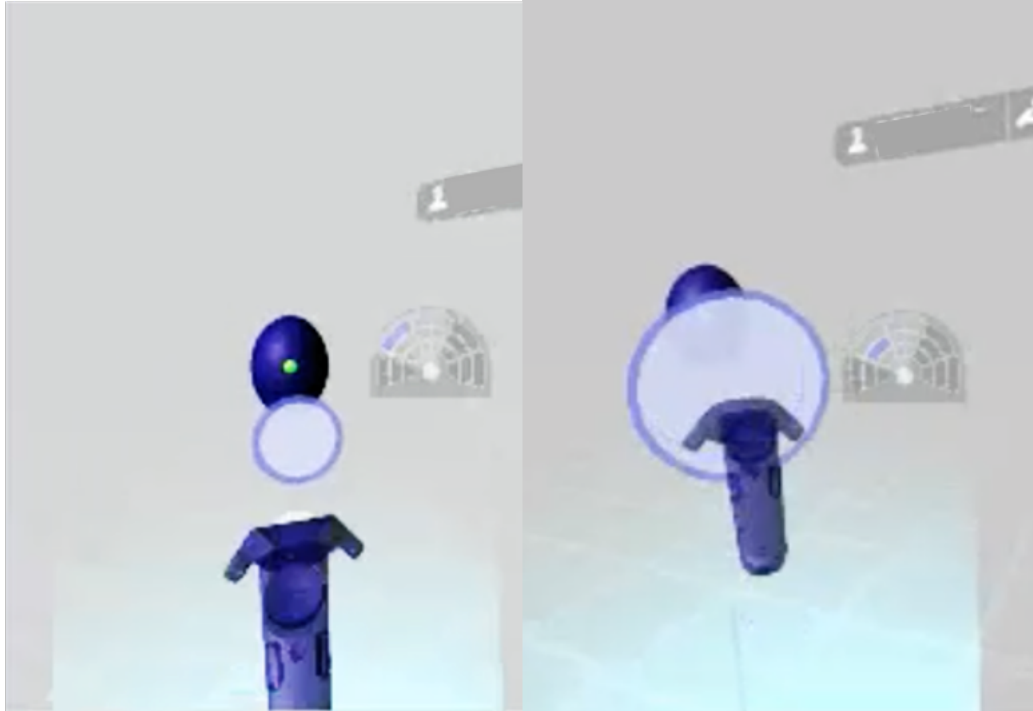

**(b) The patient's view of the virtual reality space upon task success.**

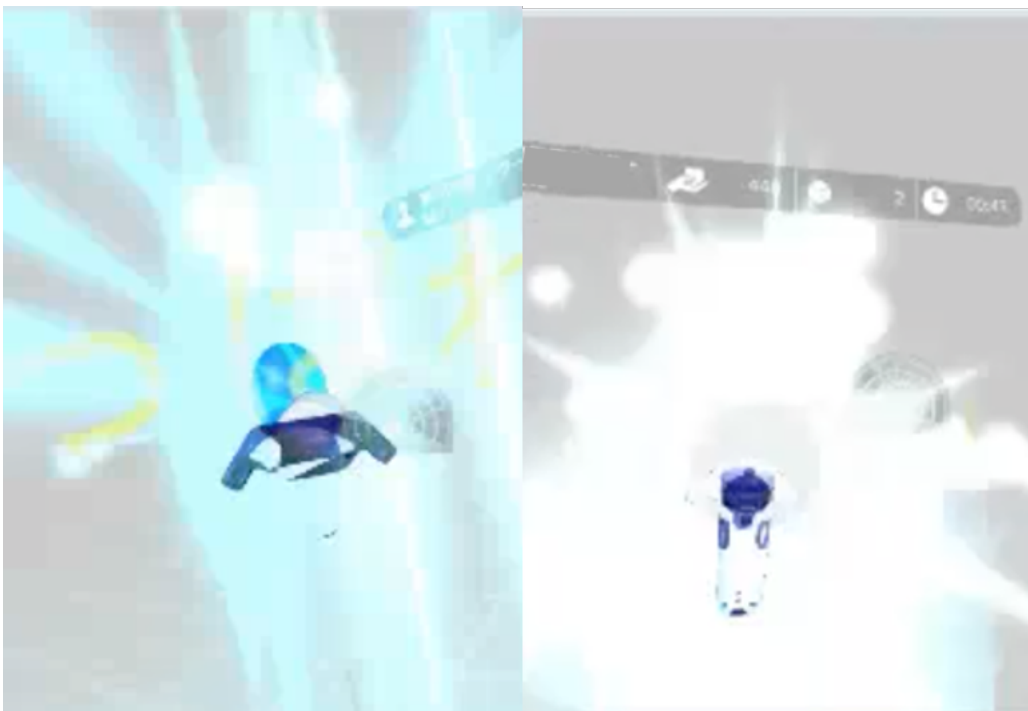

Fig. S2 (a): The participant is shown approaching a falling target from the back of the screen using the virtual controller projected from the foreground, (b): An example of the visual feedback presented upon successful completion of the task in the virtual environment.
